# Supplementary material for: Characterization of Exhaust CO, HC and NOx Emissions from Light-Duty Vehicles under Real Driving Conditions
Source: MDPI journal article supplement (doi:10.3390/atmos12091125), 2021-08-31
Supplement: s1 [file s1]

# Supplementary Materials

## Characterization of Exhaust CO, HC and NO<sub>x</sub> Emissions from Light-Duty Vehicles under Real Driving Conditions

Hui Mei <sup>1</sup>, Lulu Wang <sup>1</sup>, Menglei Wang <sup>1,2</sup>, Rencheng Zhu <sup>1,\*</sup>, Yunjing Wang <sup>3</sup>, Yi Li <sup>3</sup>,  
Ruiqin Zhang <sup>1,4</sup>,  
Bowen Wang <sup>3</sup> and Xiaofeng Bao <sup>3</sup>

<sup>1</sup> School of Ecology and Environment, Zhengzhou University, No. 100 Science Avenue, Zhengzhou 450001, China; mh2019@gs.zzu.edu.cn (H.M.); styhjwtll@gs.zzu.edu.cn (L.W.); 202010107793@mail.scut.edu.cn (M.W.); rqzhang@zzu.edu.cn (R.Z.)

<sup>2</sup> School of Environment and Energy, South China University of Technology, Guangzhou 510006, China

<sup>3</sup> State Environmental Protection Key Laboratory of Vehicle Emission Control and Simulation, Chinese Research Academy of Environmental Sciences, Beijing 100012, China; wangyj@craes.org.cn (Y.W.); liyi@vecc.org.cn (Y.L.); wangbw@craes.org.cn (B.W.); baoxf@craes.org.cn (X.B.)

<sup>4</sup> Institute of Environmental Sciences, Zhengzhou University, Zhengzhou 450001, China

\* Correspondence: zhurc@zzu.edu.cn

**Table S1.** Mileage records of all PEMS experiments in this study.

|       |        | Distance (km) |          |         |       |
|-------|--------|---------------|----------|---------|-------|
|       |        | Urban         | Suburban | highway | Total |
| LDDT1 | Test 1 | 12.77         | 17.06    | 32.48   | 62.31 |
|       | Test 2 | 12.60         | 17.30    | 32.55   | 62.45 |
| LDDT2 | Test 1 | 12.63         | 17.20    | 32.81   | 62.64 |
|       | Test 2 | 12.43         | 17.47    | 32.50   | 62.40 |
| LDDT3 | Test 1 | 12.60         | 17.80    | 32.45   | 62.86 |
|       | Test 2 | 12.76         | 17.52    | 32.30   | 62.58 |
| LDPC1 | Test 1 | 12.16         | 17.78    | 32.04   | 61.98 |
|       | Test 2 | 12.73         | 17.48    | 32.35   | 62.56 |
| LDPC2 | Test 1 | 11.31         | 17.78    | 32.61   | 61.70 |
|       | Test 2 | 12.06         | 18.15    | 32.15   | 62.30 |

**Table S2.** Average emission factors of LDPCs and LDDTs under different road conditions.

|          | LDPC      |           |           | LDDT      |           |           |
|----------|-----------|-----------|-----------|-----------|-----------|-----------|
|          | Urban     | Suburban  | Highway   | Urban     | Suburban  | Highway   |
| CO g/km  | 1.35±0.87 | 1.10±0.54 | 0.92±0.59 | 1.04±0.74 | 0.94±0.27 | 0.74±0.48 |
| NOx g/km | 0.36±.180 | 0.29±0.10 | 0.28±0.14 | 3.29±0.73 | 2.69±0.89 | 2.37±0.81 |
| HC g/km  | 0.35±0.16 | 0.19±0.09 | 0.14±0.07 | 0.40±0.22 | 0.22±0.12 | 0.15±0.10 |

**Table S3.** Average, median and maximum speeds of LDDT3 driving under three road conditions.

|          | Average speed | Median speed | Maximum speed |
|----------|---------------|--------------|---------------|
|          | km/h          | km/h         | km/h          |
| Urban    | 19.21         | 42.56        | 57.60         |
| Suburban | 37.86         | 49.07        | 72.57         |
| Highway  | 76.46         | 82.38        | 99.11         |

Table S4. Emission rates of CO, NOx and HC at different VSP bins.

| LDGV    |      |      |      | LDDT    |       |       |      |
|---------|------|------|------|---------|-------|-------|------|
| VSP Bin | CO   | NOx  | HC   | VSP Bin | CO    | NOx   | HC   |
| Number  | mg/s | mg/s | mg/s | Number  | mg/s  | mg/s  | mg/s |
| -16.00  | 0.76 | 0.59 | 0.29 | -16.00  | 5.42  | 23.32 | 2.05 |
| -14.00  | 0.02 | 0.07 | 0.35 | -14.00  | 2.98  | 13.11 | 2.12 |
| -12.00  | 0.38 | 0.81 | 0.22 | -12.00  | 4.38  | 14.80 | 2.32 |
| -10.00  | 0.14 | 1.32 | 0.21 | -10.00  | 4.32  | 16.50 | 2.44 |
| -8.00   | 0.15 | 0.41 | 0.14 | -8.00   | 4.93  | 15.83 | 2.17 |
| -6.00   | 0.14 | 0.43 | 0.14 | -6.00   | 5.41  | 16.03 | 2.25 |
| -4.00   | 0.15 | 0.36 | 0.14 | -4.00   | 6.64  | 17.59 | 2.07 |
| -2.00   | 0.38 | 0.53 | 0.19 | -2.00   | 6.02  | 18.97 | 2.23 |
| 0.00    | 0.44 | 0.35 | 0.18 | 0.00    | 4.60  | 11.98 | 1.85 |
| 2.00    | 3.74 | 0.86 | 0.40 | 2.00    | 8.07  | 27.79 | 2.57 |
| 4.00    | 2.80 | 2.31 | 0.51 | 4.00    | 9.69  | 36.64 | 2.79 |
| 6.00    | 4.36 | 1.86 | 0.59 | 6.00    | 12.08 | 46.50 | 3.16 |
| 8.00    | 4.11 | 1.62 | 0.79 | 8.00    | 20.68 | 53.06 | 3.29 |
| 10.00   | 5.35 | 2.17 | 1.09 | 10.00   | 26.13 | 56.00 | 3.10 |
| 12.00   | 9.21 | 2.97 | 1.32 | 12.00   | 13.34 | 52.71 | 2.51 |
| 14.00   | 8.01 | 5.53 | 1.46 | 14.00   | 14.54 | 60.85 | 3.03 |
| 16.00   | 6.29 | 3.64 | 1.26 | 16.00   | 19.86 | 54.54 | 2.53 |
